# Supplementary material for: Structural identification of single boron-doped graphdiynes by computational XPS and NEXAFS spectroscopy
Source: Royal Society of Chemistry journal article supplement (doi:10.1039/d4cp01222d), 2024-01-01
Supplement: d4cp01222d1.pdf [file d4cp01222d1.pdf]

**Supplementary Information for: Structural Identification of Single Boron-Doped Graphdiynes by Computational XPS and NEXAFS Spectroscopy.**

Hai-Bo Li,<sup>a</sup> Jun-Rong Zhang,<sup>b\*</sup> Xiu-Neng Song,<sup>a</sup> Chuan-Kui Wang,<sup>a</sup> Weijie Hua,<sup>b</sup> and Yong Ma<sup>a,\*</sup>

<sup>a</sup> School of Physics and Electronics, Shandong Normal University, 250358 Jinan, China.

<sup>b</sup> MIIT Key Laboratory of Semiconductor Microstructure and Quantum Sensing, Department of Applied Physics, School of Science, Nanjing University of Science and Technology, 210094 Nanjing, China

\* Corresponding authors. E-mail addresses: mayong@sdu.edu.cn (Yong Ma)  
E-mail addresses: zhangjr@njust.edu.cn (Jun-Rong Zhang)

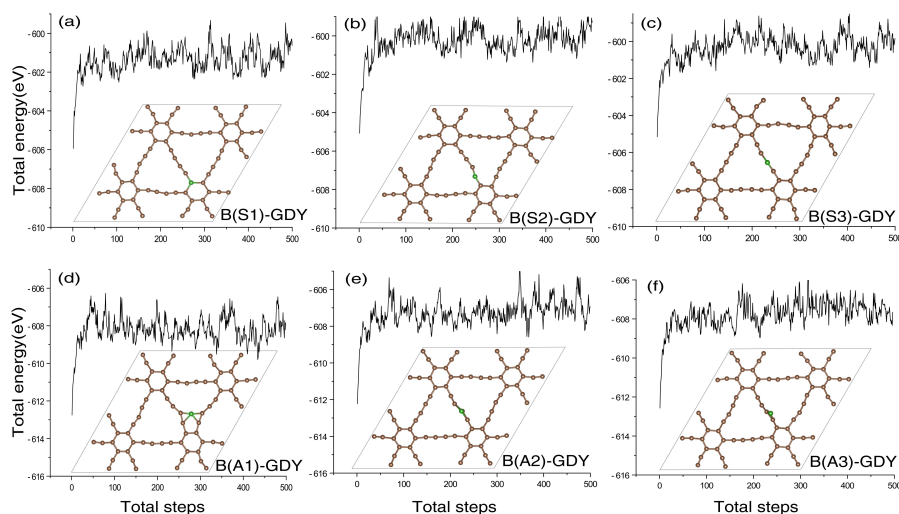

**Figure S1.** Born-Oppenheimer molecular dynamics (BOMD) production run of six boron-doped graphdiynes at 300 K, and each snapshot of the computational cell after BOMD were shown in the corresponding graph.
